# Supplementary material for: Impact of SARS-CoV-2 infection on patients with systemic lupus erythematosus in England prior to vaccination: a retrospective observational cohort study
Source: HighWire-hosted journal article supplement (doi:10.1136/bmjopen-2022-071072), 2023-11-01
Supplement: bmjopen-2022-071072supp001_data_supplement.pdf [file bmjopen-2022-071072supp001_data_supplement.pdf]

**SUPPLEMENTARY MATERIAL FOR:****Impact of SARS-CoV-2 Infection on Patients With Systemic Lupus Erythematosus in England Prior to Vaccination: A Retrospective Observational Cohort Study**

Adrian Paul J. Rabe<sup>1,2</sup> (ORCID: 0000-0001-5237-0677), Wei Jie Loke<sup>3</sup> (ORCID: 0000-0003-2266-5938), Rubana N. Kalyani<sup>4</sup> (ORCID: 0000-0003-1198-3391), Raj Tummala<sup>4</sup> (ORCID: 0000-0002-5506-4445), Heide A. Stirnadel-Farrant<sup>5</sup> (ORCID: 0000-0003-0734-0422), John Were<sup>6</sup>, and Kevin L. Winthrop<sup>7</sup> (ORCID: 0000-0002-3892-6947)

<sup>1</sup>AstraZeneca, BioPharmaceuticals Medical, Cambridge, United Kingdom

<sup>2</sup>Primary Care and Public Health, Imperial College London, London, United Kingdom

<sup>3</sup>Lister Hospital, East and North Hertfordshire NHS Trust, Stevenage, United Kingdom

<sup>4</sup>AstraZeneca US, BioPharmaceuticals R&D, Gaithersburg, MD, USA

<sup>5</sup>AstraZeneca, Oncology Business Unit, Global Medical Affairs, Cambridge, United Kingdom

<sup>6</sup>Health iQ Limited, Research Department, London, United Kingdom

<sup>7</sup>Oregon Health and Science University, Department of Infectious Diseases, Portland, OR, USA

**Corresponding author:**

Dr. Adrian Paul J. Rabe

AstraZeneca

Academy House

136 Hills Rd.

Cambridge, UK CB2 8PA

**Phone:** +44 (0)7385 083 190

**Email:** adrian.rabe@astrazeneca.com

**Supplemental Table 1** Summary table of the datasets used in the analysis

| Dataset                                                   | Data Provider | Data                                                                                                    |
|-----------------------------------------------------------|---------------|---------------------------------------------------------------------------------------------------------|
| Hospital Episode Statistics (HES)                         | NHS Digital   | Diagnoses, comorbidities, and complications                                                             |
|                                                           |               | Inpatient activity (admissions, procedures, bed days, readmissions, tariffs, specialities including CC) |
|                                                           |               | Outpatient activity (appointments, procedures, tariffs)                                                 |
|                                                           |               | A&E activity (attendances, interventions, tariffs)                                                      |
|                                                           |               | Healthcare Provider of Treatment and other interventions                                                |
|                                                           |               | Geography of CCG                                                                                        |
| Clinical Practice Research Datalink Aurum Database (CPRD) | MHRA          | Diagnoses, comorbidities, and complications                                                             |
|                                                           |               | Symptoms                                                                                                |
|                                                           |               | Diagnostic tests                                                                                        |
|                                                           |               | GP attendances                                                                                          |
|                                                           |               | Nursing visits and attendances                                                                          |
|                                                           |               | Prescriptions, component medications (including brands where feasible)                                  |
|                                                           |               | Pathway mapping in primary care                                                                         |
|                                                           |               | Costs through PSSRU                                                                                     |
| Office of National Statistics                             | ONS           | Cause of death                                                                                          |
|                                                           |               | Reported date of death                                                                                  |

A&E, accident and emergency; CC, critical care; CCG, clinical commission groups; CPRD, Clinical Practice Research Database; HES, Hospital Episode Statistics; GP, general practitioner; MHRA, Medicines and Health Products Regulatory Agency; NHS, National Health Service; ONS, Office for National Statistics; PSSRU, Personal Social Security Services Research Unit.

**Supplemental Figure 1** Flow diagram of patient identification for the final SLE cohort and subgroups

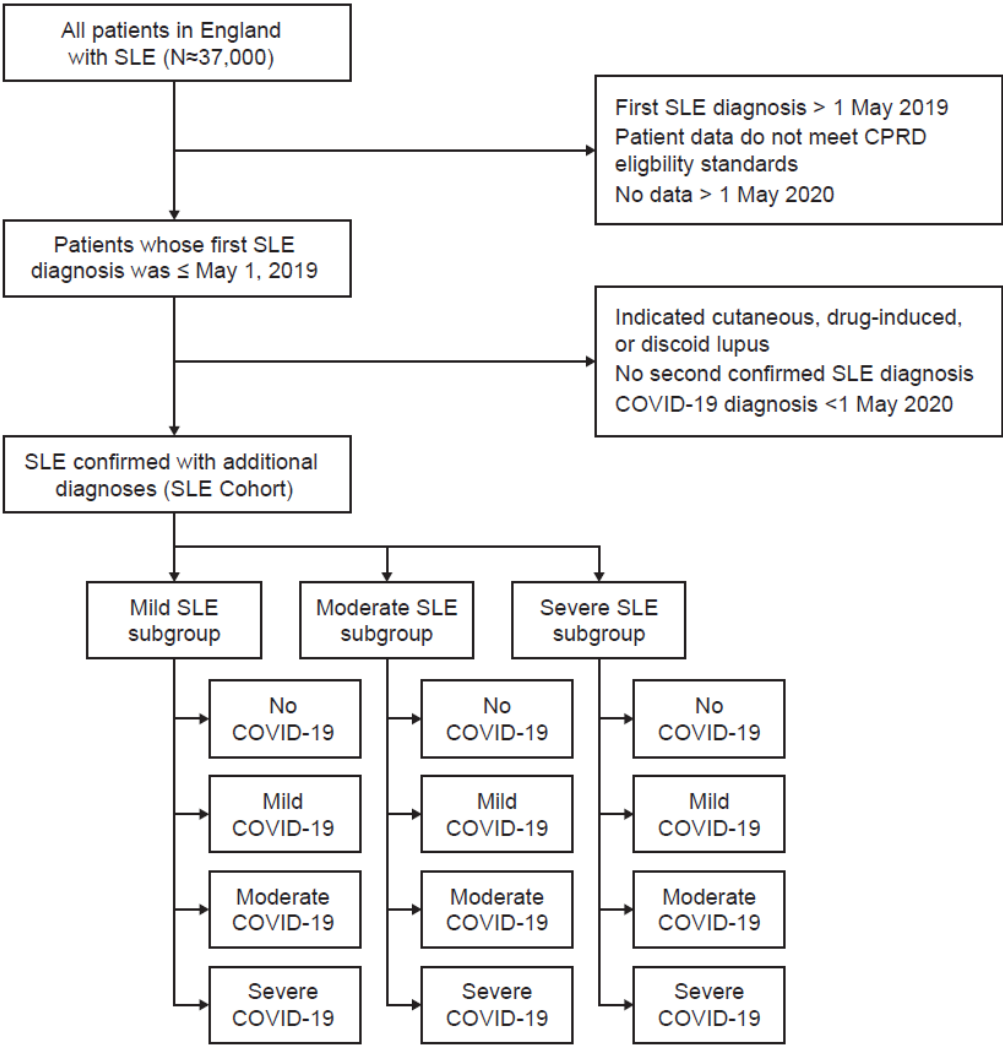

COVID-19, coronavirus disease 2019; CPRD, Clinical Practice Research Database; SLE, systemic lupus erythematosus.

**Supplemental Figure 2** Proportions of patients with mild, moderate, or severe SLE according to COVID-19 disease diagnosis

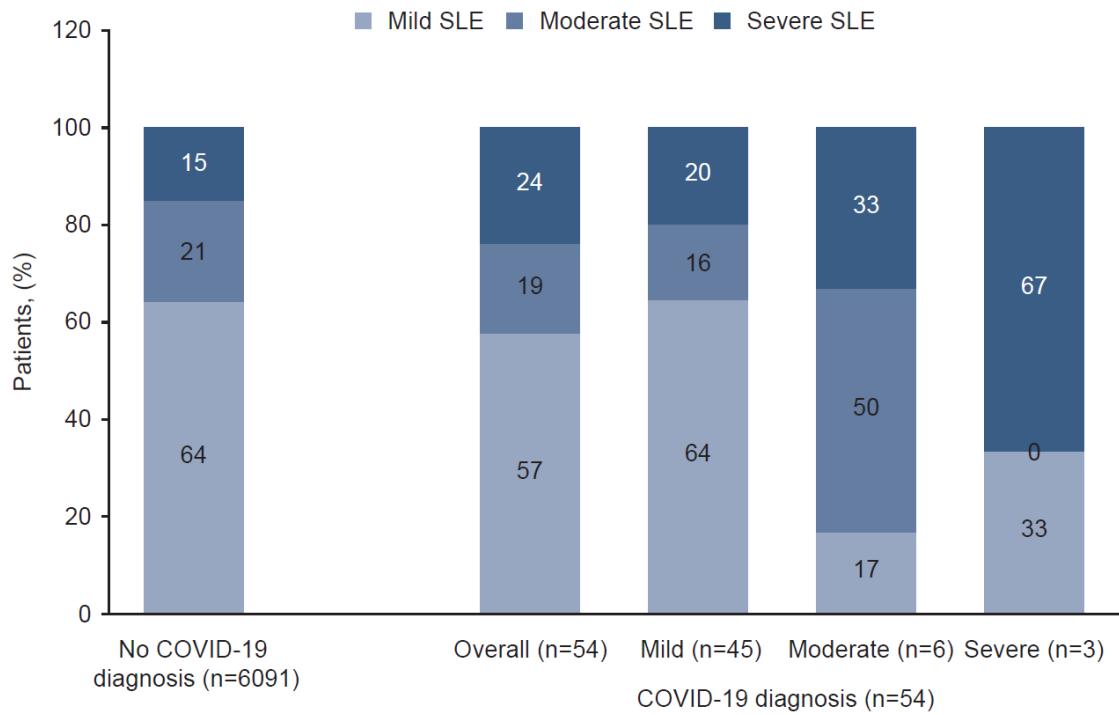

No comparative inferential statistical analyses were performed.

COVID-19, coronavirus disease 2019; SLE, systemic lupus erythematosus.
